# Supplementary material for: Impact of Emotional Intelligence-based Leadership on Relationship Conflicts and Team Cohesion in Virtual Work Environments: A Study on Malaysian Automobile Industry
Source: Research Square preprint supplement (doi:10.21203/rs.3.rs-7585520/v1), 2025-09-25
Supplement: Supplementary file 1 [file 0fdc6bf6e351d7b2d6f6ad94.docx]

# Appendix

***Demographic Questions***

**1. What is your age?**

- 25 to 34 years
- 35 to 44 years
- 45 to 54 years
- More than 55 years

**2. What is your gender?**

- Male
- Female

**3. How long have you been working in the Malaysian automobile industry?**

- 1 to 3 years
- 4 to 6 years
- 7 to 10 years
- More than 10 years

**4. How often do you work in a virtual team?**

- Daily
- Weekly
- Monthly
- Rarely

**5. What is your level of experience with virtual collaboration tools?**

- Beginner
- Intermediate
- Advanced
- Expert

***Questionnaire on Survey Items***

***Inspirational motivation (IV1)***

IM1: The leader is able to inspire me.

IM2: The leader encouraged me to continue achievement

IM3: A leader is someone who is optimistic

IM4: Leaders are able to arouse employee morale when working

IM5: My leader is an example.

IM6: My leader is proud of the employee

**Reference:** Purwanto, A. (2020). The effect of transformational leadership dimensions on job satisfaction and organizational commitment: case studies in private university Lecturers. Solid State Technology.https://papers.ssrn.com/sol3/papers.cfm?abstract_id=3986822

***Idealized influence (IV2)***

II1: My leader inspires me through being a good role model.

II2: My leader considers moral and ethical effects before making decisions.

II3: My leader encourages me to go beyond self-interest for the benefits of this bank.

II4: My leader asks for feedback on actions which affect my work performance.

II5: My leader completes the promises and commitment he/she makes.

II6: My leader builds a culture of trusting me whatever I do in the job.

**Reference:** Magasi, C. (2022). Effect of Transformational Leadership on Employee Performance: A Perspective of Leaders Influence. Business Education Journal, 8(1). http://bej.cbe.ac.tz/index.php/bej/article/view/1

***Intellectual stimulation (IV3)***

Q1: My leader encouraged me to think out of the box.

Q2: My leader helps me to take job risks.

Q3: My leader encourages me to foster creativity.

Q4: My leader encouraged me to learn new things.

Q5: Leadership behavior makes me comfortable at my work.

Q6: My leader encouraged me for continuous achievement.

**Reference:** Purwanto, A. (2020). The effect of transformational leadership dimensions on job satisfaction and organizational commitment: case studies in private university Lecturers. *Solid State Technology*.https://papers.ssrn.com/sol3/papers.cfm?abstract_id=3986822

***Individualized consideration (IV4)***

Q1: My leader knows my ability in work.

Q2: My leader always encourages me at work.

Q3: My leader gave examples of jobs that I did not understand.

Q4:. My leader is always ready to listen to criticism about his activities.

Q5: My leader is always ready to listen to suggestions from his employees.

Q6: My leader is able to inspire me.

**Reference:**  Purwanto, A. (2020). The effect of transformational leadership dimensions on job satisfaction and organizational commitment: case studies in private university Lecturers. *Solid State Technology*.https://papers.ssrn.com/sol3/papers.cfm?abstract_id=3986822

***Emotional Expression (MV)***

EE1: I get in touch with my feelings through the process of making a virtual environment.

EE2: I am able to depict my feelings in team cohesion. .

EE3: Through the process of making relationships, I am able to discover what is at play within me.

EE4: I am able to express my feelings through the process of making team cohesion.

EE5: I am able to make things fall into place in the virtual environment.

EE6: I apply the new behavior that I have been experimenting with in virtual therapy outside of the therapy setting.

**Reference:** Haeyen, S., & Noorthoorn, E. (2021). Validity of the self-expression and emotion regulation in art therapy scale (SERATS). Plos one, 16(3), e0248315. https://doi.org/10.1371/journal.pone.0248315

***Relationship Conflicts and Team Cohesion (DV)***

RCTC1: I feel I am prevented from choosing the way I carry out tasks

RCTC2: People in the team are always warm and friendly toward each other.

RCTC3: People in the team are working toward a common objective.

RCTC4: People in the team trust each other.

RCTC5: People in the team almost always speak well of it.

RCTC6: There is a lot of personal loyalty to the team

**Reference 1:** Alam, T., Ullah, Z., AlDhaen, F. S., AlDhaen, E., Ahmad, N., & Scholz, M. (2021). Towards Explaining Knowledge Hiding through Relationship Conflict, Frustration, and Irritability: The Case of Public Sector Teaching Hospitals. *Sustainability*, *13*(22), 12598. https://doi.org/10.3390/su132212598

**Reference 2:** Riisla, K., Wendt, H., Babalola, M. T., & Euwema, M. (2021). Building Cohesive Teams—The Role of Leaders’ Bottom-Line Mentality and Behavior. *Sustainability*, *13*(14). mdpi. https://www.mdpi.com/2071-1050/13/14/8047/pdf
